# Supplementary material for: Vision‐Based System for Assisting Blind People to Wander Unknown Environments in a Safe Way
Source: Hindawi journal article supplement (doi:10.1155/2021/6685686), 2021-01-01
Supplement: f1 [file 6685686.f1.docx]

## Supplementary Materials

Video S1. AssistNavBPv1.1 with new experiments. Vision-Based System for Assisting Blind People to Wander. Link: https://youtu.be/rUWETxEx5yY
